# 1 **Challenging popular belief, mosquito larvae breathe underwater**

2  
3  
4  
5 Running title: *Mosquito larvae breathe underwater*

6  
7 Agustin Alvarez-Costa<sup>1,2\*</sup>, Maria Soledad Leonardi<sup>1,3\*</sup>, Silvère Giraud<sup>1</sup>, Pablo E. Schilman<sup>2</sup>  
8 and Claudio R. Lazzari<sup>1</sup>✉

9  
10 <sup>1</sup>Institut de Recherche sur la Biologie de l’Insecte, UMR7261 CNRS - University of Tours,  
11 Tours, France.

12 <sup>2</sup>Instituto de Biodiversidad y Biología Experimental y Aplicada, IBBEA-CONICET-  
13 University of Buenos Aires, Buenos Aires, Argentina.

14 <sup>3</sup>Instituto de Biología de Organismos Marinos, IBIOMAR-CONICET, Puerto Madryn,  
15 Argentina.

16  
17 \* These two authors equally contributed to the work

18  
19 Authors ORCID:

20 AAC: 0000-0003-4188-0465

21 MSL: 0000-0002-1736-7031

22 SG: None (student)

23 PES: 0000-0003-1485-1650

24 ✉CRL: 0000-0003-3703-0302

25  
26 -----  
27 ✉Corresponding author:

28  
29 Claudio R. Lazzari  
30 Institut de Recherche sur la Biologie de l’Insecte  
31 UMR 7261 CNRS - Université de Tours  
32 Faculté des Sciences et Techniques  
33 Parc Grandmont, 37200 Tours  
34 France

35  
36 Tel. + 33 (0)2 47 36 73 89 / FAX +33 (0)2 47 36 69 66

37 E-mail: [claudio.lazzari@univ-tours.fr](mailto:claudio.lazzari@univ-tours.fr)  
38

*Alvarez-Costa et al.*

## 39 Summary statement

40 We present the first quantitative analysis of mosquito larvae respiration in air and water,  
41 unravelling the unknown capacity of larvae of the most cosmopolitan disease vector of  
42 breathing underwater.

43

## 44 Abstract

45 It is taken for granted that immature mosquito only breathe atmospheric air through  
46 their siphons. However, there is no quantitative study that demonstrated it. We analysed the  
47 survival of the last instar larvae of *Aedes aegypti* fully submerged at different temperatures,  
48 and measured oxygen consumption from air and dissolved in water, of larvae and pupae of this  
49 species under different conditions. Results revealed that under water, larvae survived much  
50 longer than expected, reaching 50% mortality only after 58, 10, and 5 days at 15°, 25° and  
51 35°C, respectively. Interestingly, whereas we registered moults to pupae in larvae with access  
52 to air, individuals kept submerged never moulted. When remaining at the water surface, larvae  
53 obtained 12.72% of O<sub>2</sub> from the water, while pupae only 5.32%. When completely submerged,  
54 larvae consumed less oxygen than in contact with the surface, but enough for surviving, while  
55 pupae did not. At both media, temperature affected larvae respiration rate, with relatively close  
56 Q<sub>10</sub> values. In the related species, *Ae. albopictus*, a similar pattern of O<sub>2</sub> consumption were  
57 observed. Larvae got 12.14% of their oxygen from the water. Interestingly, no significant  
58 differences in total O<sub>2</sub> consumption were found between water O<sub>2</sub> consumption, when *Ae.*  
59 *albopictus* larvae were submerged, or when they also have access to air (dual O<sub>2</sub> consumption).  
60 Our findings not only challenge the classical idea that mosquito larvae only breathe  
61 atmospheric O<sub>2</sub>, but also force us to reconsider the potential effectiveness of control methods  
62 based on asphyxiating larvae by detaching from water surface.

63

64

65 **Keywords:** *Aedes*, metabolism, survival, respiration, temperature, Q<sub>10</sub>

66

67

## 68 **Introduction**

69 As an originally terrestrial group and from an evolutionary standpoint, when insects  
70 colonized the freshwater, have to deal with many vital functional problems. Respiration was  
71 probably the greatest one. As an environment, water is a less favourable medium for respiration  
72 because its oxygen concentration is twenty times lower, and its rate of oxygen diffusion is  
73 lower by a factor of 105 (Dejours, 1988). In this sense, insects that had adapted to water  
74 environments developed plenty of different strategies to acquire oxygen. Among them, there  
75 are examples of cutaneous respiration, developed spiracular, tracheal, and blood gills, the use  
76 of air stores carrying air bubbles, or the use of hydrofuge structures to remain attached to the  
77 water surface and breathe atmospheric air (Wigglesworth, 1972). It is taken for granted that the  
78 last is the case of mosquito larvae and pupae, who would use their siphons as “snorkels” when  
79 they rest attached to water surface. This statement is widely affirmed in textbooks, internet  
80 scientific and dissemination sites, and also in protocols for controlling mosquito populations at  
81 juvenile stages. Yet, the vital role of aerial respiration in immature mosquitoes has been  
82 challenged by sporadic observations since long time ago (e.g., Da Costa Lima, 1914; MacFie,  
83 1917; Ramsey and Carpenter, 1932; Wang, 1938; Richards, 1941).

84 Even though it seems reasonable that atmospheric air would constitute the main  
85 source of oxygen, it cannot be excluded that mosquito larvae and pupae could gather some  
86 oxygen from the water. On the one hand, the survival underwater of larvae belonging to  
87 different mosquito species, along with some measurements of oxygen consumption from the  
88 water (Sen, 1914; Fraenkel and Herford, 1938) are pieces of evidence that water-dissolved  
89 oxygen could be sufficient for maintaining vital functions during periods without contact  
90 with the surface. However, the relative contribution atmospheric and water-dissolved oxygen  
91 to the metabolism of mosquito larvae and pupae has not been yet investigated.

92 In our study, we attempt to shed light on respiratory gas exchange in immature  
93 mosquito stages. We analysed the survival and oxygen intake of mosquito larvae and pupae  
94 having or not having access to air and measured the effect of the temperature on these variables.  
95 For the first time, we provide quantitative data on oxygen consumption from air and water,  
96 measuring them both, separately and simultaneously. Finally, we discuss the evidence obtained  
97 during our experiments in the framework of mosquito respiratory physiology, as well as the  
98 possible consequence of our findings for control methods based on the suffocation of juvenile  
99 mosquitoes

*Alvarez-Costa et al.*

## 100 **Materials and methods**

### 101 *Mosquitoes*

102 Eggs of *Aedes aegypti* of the Bora strain (insecticide susceptible) and *Ae. albopictus* of  
103 Vectopole strain reared at Vectopole (Montpellier, France) were provided by the European  
104 network InFravec2 (<https://infravec2.eu/>). Eggs were put in dechlorinated tap water for  
105 hatching, adding traces of ascorbic acid and tropical fish food, and kept at 26°C ( $\pm$  1°C) in a  
106 climatic chamber, under a light/dark cycle 12h:12h/ (lights on at 08:00 am). Food was regularly  
107 provided until they reached the 4<sup>th</sup> instar (6-10 days in our conditions), and used for  
108 experiments. Individuals were handled by aspirating them with plastic Pasteur pipettes with  
109 their tip cut. Each larva was tested only once and discarded afterward.

### 110 *Survival experiments*

111 The survival time of fourth-instar larvae of *Ae. aegypti* was evaluated at three  
112 temperatures (15°, 25°, and 35°C). A climatic chamber was set at the experimental temperature,  
113 and these values were kept constant at nearly 1°C. A 12h:12h light cycle was imposed with  
114 lights on at 08:00 am. Relative humidity was kept at 70% to reduce the evaporation of the water  
115 in the recipients. In case some evaporation occurred, deionised water was daily added to return  
116 to the initial volume.

117 For each temperature, two larvae were placed in recipients with 300 ml of dechlorinated  
118 water under two conditions, submerged or with access to air. In both cases, a unique larva was  
119 placed into a glass cylinder (0.6 cm in diameter and 2 cm in length), both ends closed by a  
120 tissue mesh kept with the aid of an O-ring; to allow water circulation, but keeping the larva  
121 caged at the same time. In the first condition (submerged), the cylinder was completely sunk  
122 at the bottom of the recipient, taking care that no air remained captive inside. The control  
123 condition consisted of a larva placed in the same cylinder maintaining half of it in contact with  
124 the air, and the other half underwater (Fig. S1). No food was provided, but the water was neither  
125 changed, nor the development of microorganisms impeded. Recipients were placed inside a  
126 climatic chamber at 15°, 25° or 35°C ( $\pm$  0.5°C), under a light/dark cycle at 12h:12h/ (lights on  
127 at 08:00 am). The number of dead and moulted insects was recorded daily.

### 128 *Oxygen consumption*

*Alvarez-Costa et al.*

129 The individual oxygen consumption of immature *Ae. aegypti* was measured using  
130 optodes. We employed two 4-channel Firesting O<sub>2</sub> meter (Pyro Science, Aachen, Germany)  
131 using 4 ml vials with an integrated optical oxygen transducer (OXVIAL 4). Briefly, flashes of  
132 light of specific wavelengths generated in the interface are guided through a light fibre to excite  
133 a transducer inside the vial from the outside. The fluorescens of the substance, which is  
134 proportional to the oxygen concentration in the medium (air or water) is gathered by the same  
135 optic guide and analysed at the interface. The temperature of the vials was controlled using a  
136 Peltier element and controller (QuickCool 34W; Peltron GmbH, Germany). A temperature  
137 sensor from the oxygen meter measured the temperature inside an empty vial, and its signal  
138 allowed the system to adjust the values of the measured O<sub>2</sub> concentrations.

139 Fourth-instar larvae of *Ae. aegypti* and *Ae. albopictus*, and pupae of *Ae. aegypti* were  
140 evaluated. Most measurements were carried out on *Ae. aegypti* under three vial conditions:  
141 submerged, closed vial, and open vial, at 15°, 25° and 35°C. The condition submerged  
142 consisted in a closed vial filled with water with an individual inside, and water O<sub>2</sub> concentration  
143 was registered for four hours. In this treatment, the total absence of air bubbles was carefully  
144 checked. For the closed vial condition, an individual of the mosquito immature stage was  
145 placed in a closed vial half filled with water, and the water and air O<sub>2</sub> concentration was  
146 registered for four hours. Finally, the open vial condition consisted of an open half-filled water  
147 vial with an individual mosquito inside, and the water O<sub>2</sub> concentration was registered for four  
148 hours. Each treatment was replicated between 12 and 30 times. The rate of oxygen consumption  
149 was calculated for each replicate, calculating the slope of a linear regression of the O<sub>2</sub>  
150 concentration versus the time of the experiments. For *Ae. albopictus* same assays were  
151 performed except for open vial condition and close vials at 15 and 35°C.

## 152 *Statistics*

153 To analyse differences in survival across temperatures and conditions (submerged and  
154 control) a Kaplan-Meier analysis was performed.

155 For the analyses of oxygen consumption, the effects of vial conditions (submerged,  
156 closed vial, and open vial), temperature (15°, 25° or 35°C), the medium where O<sub>2</sub> was taken  
157 (air or water) and stage (larva or pupa) in O<sub>2</sub> consumption one or two-ways ANOVAs were  
158 performed. *A posteriori* comparisons of significant ANOVAs were performed by means of  
159 Tukey test. The significance threshold was chosen at 0.05 for all analyses.

160

## 161 **Results**

### 162 *Survival experiments*

163         The survival of *Ae. aegypti* larvae were significantly affected by the temperature and  
164 immersion conditions ( $p < 0.05$ ). In the control treatment (i.e., with access to air) at 25°C, no  
165 death was registered, and the survival curve was significantly higher than the curve of the  
166 submerged treatment at the same temperature. At 35°C, the survival curve of the submerged  
167 larvae presented the lowest values with the higher negative slope, differing significantly from  
168 its control at the same temperature. Surprisingly, at 15 °C the submersion treatment did not  
169 differ from the control (Fig. 1A). The 50% mortality of submerged larvae differed with the  
170 temperature, being 58, 10, and 5 days at 15°, 25°, and 35°C, respectively (Fig. 1B).  
171 Remarkably, some individuals remained alive for as long as 30 days at 25°C and 68 days at  
172 15°C. Finally, whereas we registered moults to pupae in control larvae, individuals kept  
173 submerged never moulted (Table 1).

### 174 *Oxygen consumption*

#### 175 *Larvae and pupae at 25°C*

176         In all three conditions: submerged, closed vial and open vial, *Ae aegypti* larvae and  
177 pupae evinced to consume measurable amounts of oxygen from the water (Fig. 2). A significant  
178 difference in O<sub>2</sub> consumption from the water was observed between the interaction of immature  
179 stages and the vial conditions (two-way ANOVA F: 107.31, DF: 5,  $p < 0.0001$ ). Larvae under  
180 the submerged condition presented the highest rate of water-dissolved O<sub>2</sub> consumption,  
181 followed by pupae under the same vial conditions. In addition, larvae under closed vial and  
182 open vial conditions presented higher rates of O<sub>2</sub> consumption than pupae under the same vial  
183 conditions, but their O<sub>2</sub> consumption rates were always lower than larvae and pupa under  
184 submerged conditions (Fig. 2). No significant difference was found between closed and open  
185 vial treatments for both immature stages, allowing us to employ closed vials for next  
186 measurements.

187         Pupae presented higher oxygen consumption from the air than larvae under closed vial  
188 conditions (two-way ANOVA, F: 119.75, DF: 3,  $p < 0.0001$ , Fig. 3). The air O<sub>2</sub> consumption of

*Alvarez-Costa et al.*

189 both immature stages tested was significantly higher than their water O<sub>2</sub> consumption (p<0.05,  
190 Fig. 3). The dual rate of O<sub>2</sub> consumption, adding air and water O<sub>2</sub> consumption of closed vial  
191 treatment, were 0.111 and 0.128 moles/h for larvae and pupae respectively. Larvae obtained  
192 most of their oxygen from the air, but about 13% from water, while pupae obtained almost  
193 95% from the air and the rest from water (Fig. 4B, C). Finally, the dual (air + water) O<sub>2</sub>  
194 consumption in closed vial condition was significantly higher than O<sub>2</sub> consumption from the  
195 water of the submerged condition (two-way ANOVA, F: 68.85, DF: 3, p<0.0001, Fig. 4).

196 *Effect of temperature on oxygen consumption (Q<sub>10</sub> of larvae)*

197 The consumption of water-dissolved oxygen of *Ae. aegypti* larvae when they were  
198 submerged, also significantly varied with temperature (one-way ANOVA, F: 33.46, DF: 2,  
199 p<0.0001). The highest O<sub>2</sub> consumption was registered at 35°C, followed by 25°C, and the  
200 lowest one was registered at 15°C. The Q<sub>10</sub> calculated between 15° and 25°C was 1.47 and 1.66  
201 between 25° and 35°C, so the mean Q<sub>10</sub> across the experiment was 1.56. Also, O<sub>2</sub> consumption  
202 from air of *Ae. aegypti* larvae significantly varied with temperature (one-way ANOVA, F:  
203 18.09, DF: 2, p<0.0001). The highest O<sub>2</sub> consumption was registered at 35°C, followed by  
204 25°C, and the lowest was registered at 15°C. The Q<sub>10</sub> calculated between 15° and 25°C was  
205 2.21 and between 25° and 35°C was 1.45, so the mean Q<sub>10</sub> across the experimental temperatures  
206 was 1.83.

207 *Aedes albopictus*

208 Similar patterns of O<sub>2</sub> consumption were observed in *Ae. albopictus*. A significant  
209 difference in O<sub>2</sub> consumption from the water was observed between vial conditions (one-way  
210 ANOVA, F: 278.36, DF: 1, p<0.0001, Fig. 5). *Ae. albopictus* larvae from the submerged  
211 condition treatment presented significantly higher O<sub>2</sub> consumption than larvae from the closed  
212 vial (Fig. 5). In the closed vial condition, the mean dual (air + water) rate of O<sub>2</sub> consumption  
213 was 0.0185 μmoles of O<sub>2</sub>/h for larvae. They consumed a significantly higher amount of O<sub>2</sub>  
214 (around 88%) from the air than from water (one-way ANOVA, F: 27.97, DF: 1, p< 0.0001,  
215 Fig. 6). Interestingly, no significant differences in the total O<sub>2</sub> consumption of *Ae. albopictus*  
216 larvae were found between water-dissolved oxygen consumption when they were submerged  
217 or when they also had access to air (dual O<sub>2</sub> consumption) in the closed vial condition (one-  
218 way ANOVA, F: 0.99, DF: 1, p= 0.325, Fig. 7).



*Alvarez-Costa et al.*

219 On the other hand, the temperature affected the rate of O<sub>2</sub> consumption from water (one-  
220 way ANOVA, F: 77.52, DF: 2, p<0.0001). The rate of O<sub>2</sub> consumption did not differ  
221 significantly between 15° and 25°C, but a significant increase was registered between either  
222 15° or 25° and 35°C. The Q<sub>10</sub> calculated between 15° and 25°C was 1.47, and between 25° and  
223 35°C was 3.01, so the average Q<sub>10</sub> between 15° and 35°C was 2.24.

224

## 225 **Discussion**

226 We report the first quantitative data on oxygen consumption, both from the air and from  
227 the water, by larvae and pupae of two major disease vectors, *Aedes aegypti* and *Ae. albopictus*.  
228 In both cases, far from a great surprise, most of the oxygen consumed comes from atmospheric  
229 air, but not all of it. The portion gathered from the water is low, but physiologically significant,  
230 which means it is just enough for survival, and much lower in pupae, which obtain practically  
231 the totality of the oxygen they consume from the air.

232 Even though underwater respiration by mosquito larvae has been repeatedly reported,  
233 this phenomenon remained anecdotal, deserving no attention by most people. In fact, not only  
234 there is no evidence to what extent oxygen gathered from water might be physiologically  
235 significant to mosquito larvae, but it has been completely ignored as a potential drawback in  
236 control procedures involving larval suffocation. Indeed, being detached from the surface and  
237 losing contact with the air, does not mean the immediate death of the larvae by asphyxiation.  
238 In complete submersion, they were capable of surviving for days, weeks, or even months,  
239 depending on the temperature of the water.

240 As can be expected for a poikilotherm and ectotherm organism, water temperature has  
241 a significant impact on larval metabolism, which is reflected in the intensity of both aerial and  
242 aquatic respiration. This dependence is quantitatively expressed by the calculation of Q<sub>10</sub>  
243 values for oxygen consumption, and also by the differential survival time of completely  
244 submerged larvae across a wide range of temperatures. As expected, the lower the temperature,  
245 the longer the survival time observed. This fact can be explained by the modulation of larvae  
246 metabolism, reflected on the Q<sub>10</sub> different from 1, together with a higher O<sub>2</sub> concentration in  
247 the water, since the solubility of oxygen increases as temperature decreases. So, in tropical



*Alvarez-Costa et al.*

248 areas or areas where human activities result in relatively warm temperatures, we could expect  
249 a lower capacity to tolerate immersion for prolonged periods.

250 Interestingly, the moult cycle was markedly affected by the deprivation of access to  
251 atmospheric air. No larva was capable of accomplishing a normal moult in the prolonged  
252 submersion experiments. The oxygen gathered exclusively from the water resulted to be  
253 sufficient for surviving and swimming (larvae did not remain immobile nor in akinesis into the  
254 tubes), but not enough for moulting. Only larvae kept at the lower temperature showed signs  
255 of incomplete ecdysis after many weeks under water, which indicates that the first steps of the  
256 moult process took place. Probably, ecdysis is excessively expensive in terms of energetic  
257 demands to complete it under these conditions.

258 Aquatic respiration was reported several times in mosquito larvae. One of the first  
259 scientists to turn his interest towards water respiration in mosquito larvae was the Brazilian  
260 entomologist Ângelo Moreira Da Costa Lima more than a century ago. He performed a series  
261 of experiments placing larvae of different Culicidae species under complete submersion and  
262 reporting day by day the status of each individual (Da Costa Lima, 1914). The author observed  
263 that some larvae survived for several days and that one larva whose “leaflets” (i.e., anal  
264 papillae) had been removed, returned at the surface more often than another intact used as  
265 control. These results led the author to assert: “*The results of my experiments convinced me  
266 that mosquito larvae, while generally breathing mainly free air by the two tracheae of the  
267 respiratory syphon, also respire the oxygen of the air dissolved in water, the gaseous exchanges  
268 being made by the branchial leaflets and the general integument of the body.*”. This assertion  
269 was criticised by colleagues, who distrusted the results due to poor control of the experimental  
270 conditions (Sen, 1914). Da Costa Lima (1916) replicated some of the original experiments  
271 taking additional care and reporting similar observations to his previous ones. On the other  
272 hand, Da Costa Lima noted the resemblance to gills of anal papillae, in line with other  
273 colleagues considering these structures as respiratory organs in aquatic Diptera (Koch, 1938).  
274 The demonstration of the osmoregulatory function of the papillae (Wigglesworth, 1932, 1933,  
275 review by Bradley, 1987), together with the general assumption that the potential contribution  
276 of oxygen dissolved in the water should be insignificant, rapidly made aquatic respiration to  
277 be disregarded as physiologically relevant for mosquito larvae (Thorpe, 1933).

278 Other early investigations, such as those conducted by MacFie (1917), Ramsey and  
279 Carpenter (1932), Wang (1938), and Richards (1941) focussed on the oxygen requirements of

*Alvarez-Costa et al.*

280 mosquito larvae by submerging them in oxygenated or deoxygenated water, observing  
281 differential survival. According to our results (Fig. 5), and those obtained by Fraenkel and  
282 Herford (1938), fully submerged *Ae. aegypti* larvae would consume only half as much oxygen  
283 as larvae swimming in the normal manner. However, this is not the case in *Ae. albopictus*,  
284 whose larva can gather similar amounts of oxygen when fully submerged or attached to the  
285 surface (Fig. 8).

286 Using a different experimental approach, Krogh (1941) noticed that the gaseous  
287 pressure in the trachea of *Culex* larvae reduced during submersion; according to the author,  
288 this could be caused by the withdrawal of oxygen for respiration and the loss of CO<sub>2</sub> through  
289 the external cuticle. This author estimated the volume of the tracheae close to 1.5 µlitre,  
290 suggesting that the content of oxygen would be enough for surviving 5-10 min underwater  
291 Krogh (1941).

292 Hagstrum (1970) measured the aerial and aquatic respiration of larvae of different  
293 species, in the presence of petroleum oils in the water. His study suggested that for *Ae. aegypti*  
294 aquatic respiration could represent *ca.* 5-20% of aerial respiration, rather than 50% as formerly  
295 proposed by Fraenkel and Herford (1938). This agrees with our results where the aquatic  
296 respiration of *Ae. aegypti* larvae constituted about 13%. Hagstrum (1970) also reported delayed  
297 mortality in *Ae. aegypti* larvae, although their tracheae were blocked with petroleum oil, noting  
298 that these larvae were unable to pupate.

299 Later on, different authors started to focus their attention on the fact that the amount of  
300 oxygen dissolved in the water might impact on the survival of larvae and pupae, and, as a  
301 consequence, eventually affect their control based on larval suffocation. Reiter (1978) kept  
302 submerged larvae of three mosquito species in water with fixed dissolved oxygen contents and  
303 at different temperatures. The author concluded that those larvicides which kill by anoxia are  
304 likely to be effective only when the water is less than 30% saturated with oxygen, the exact  
305 value depending on the species. Westwood et al. (1983) and Silberbush et al. (2015) extended  
306 this idea to larvae living in natural environments with access to the air, providing additional  
307 quantitative data related to survival and oxygen saturation in the water.

308 Interestingly, different authors commenced in recent years to insinuate that breathing  
309 in mosquito larvae may have been misunderstood, raising questions about canonical  
310 assumptions and the real effectiveness of larval suffocation as a method for controlling natural

*Alvarez-Costa et al.*

311 populations of mosquitoes. For instance, in an attempt to understand the underlying mechanism  
312 of breathing cut-off (e.g., wettability of the siphon), Lee et al. (2018) exposed larvae of *Aedes*  
313 *togoi* to water treated either with oil-film layers or with surfactants (i.e., substances impeding  
314 larvae to remain attached to the water surface). The survival times recorded were variable  
315 according to the treatment, but reached times of about one day. The authors concluded that  
316 cutaneous respiration dependent on the oxygen concentration in the water could affect the  
317 efficacy of larval asphyxiation methods. In this sense, Lee et al. (2018) underlined the need to  
318 prevent oxygen dissolution by blocking the exchange between the water and the atmospheric  
319 air at the surface. It is clear that this procedure would negatively affect not only mosquitoes,  
320 but also the rest of the organisms living in the same environment. More recently, Nyberg and  
321 Muto (2020) investigated the mechanism of action of what authors called “*mosquito acoustic*  
322 *larviciding*”. They reported that their acoustic treatment provoked the tracheal system a series  
323 of what they reported as “*previously unobserved phenomena*” According to Nyberg and Muto  
324 (2020), these phenomena would be difficult to explain based on the present knowledge of  
325 mosquito respiration, eventually concluding that the respiratory function in mosquitoes is far  
326 from being completely understood.

327 Our study sheds light on the respiratory physiology of the mosquito aquatic instars by  
328 analysing the survival and oxygen intake of mosquito larvae and pupae having or not having  
329 access to the air, and measuring the effect of the temperature on these variables. For the first  
330 time, we provide quantitative data on oxygen consumption from air and water, which have  
331 been measured separately and simultaneously. Our work also provides evidence demonstrating  
332 how our limited knowledge of crucial aspects of mosquito respiratory physiology may  
333 compromise control methods based on the suffocation of juvenile mosquitoes.

334

### 335 **Acknowledgements.**

336 Authors want to express their gratitude to the University of Tours, CNRS ANR and  
337 LESTUDIUM (France); CONICET, University of Buenos Aires and MINCYT (Argentina),  
338 The Company of Biologist (UK) and the ECOS-Sud programme (France-Argentina) A part of  
339 this work was conducted during the Master thesis of SG at the Univ. Tours. MSL is grateful to  
340 Nicolas and Simona Albanese, for their unconditional support.

*Alvarez-Costa et al.*

341 **Competing interest**

342 Authors declare no competing nor financial interests.

343 **Funding.**

344 AAC received a Travelling Fellowship from The Journal of Experimental Biology and  
345 grants from CONICET and ANPCYT-PICT 2019-01248, MSL Visiting Researcher grants  
346 from LESTUDIUM and CONICET, PES was an Invited Scientist from the University of Tours.  
347 PES and CRL want to thank the support of the ECOS-Sud Programme and CRL to that of the  
348 ANR (project ANORHYTHM).

349

350 **References**

351 **Bradley, T. J. (1987).** Physiology of osmoregulation in mosquitoes. *Annu. Rev. Entomol.* **32**,  
352 439-462.

353 **Da Costa Lima, A. (1914).** Contributions to the study of the Biology of the Culicidae. *Mem.*  
354 *Inst. Oswaldo Cruz* **6**, 18-35.

355 **Da Costa Lima, A. (1916).** Contributions to the study of the Biology of the Culicidae. *Mem.*  
356 *Inst. Oswaldo Cruz* **8**, 44-49.

357 **Dejours, P. (1988).** Respiration in water and air. Amsterdam, Netherlands: Elsevier.

358 **Fraenkel, G. and Hereford, G. V. B. (1938).** The respiration of insects through the skin. *J.*  
359 *Exp. Biol.* **15**, 266-280.

360 **Hagstrum, D. W. (1970).** Simultaneous Measurement of Aerial and Aquatic Respiration and  
361 Study of Mode of Action of Petroleum Oils. *Ann. Entomol. Soc. Am.* **63**, 1466-1467.

362 **Koch, H. J. (1938).** The absorption of chloride ions by the anal papillae of Diptera larvae. *J.*  
363 *Exp. Biol.* **15**, 152-160.

364 **Krogh, A. (1941).** Comparative Physiology of Respiratory mechanisms. Philadelphia, USA:  
365 University of Pennsylvania Press.

*Alvarez-Costa et al.*

- 366 **Lee, S. J., Kim, J. H. and Lee, S. C. (2018).** Effects of oil-film layer and surfactant on the  
367 siphonal respiration and survivorship in the fourth instar larvae of *Aedes togoi* mosquito in  
368 laboratory conditions. *Sci. Rep.* **8**, 5694.
- 369 **MacFie, J. W. S. (1917).** The limitations of kerosene as a larvicide, with some observations  
370 on the cutaneous respiration of the mosquito larva. *Bull. Entomol. Res.* **7**, 277-295.
- 371 **Nyberg, H. J., and Muto, K. (2020).** Acoustic tracheal rupture provides insights into larval  
372 mosquito respiration. *Sci. Rep.* **10**, 2378.
- 373 **Ramsey, G. C. and Carpenter, J. A. (1932).** An investigation of petroleum oils for malaria  
374 control purposes. *Rec. Malaria Surv. India* **3**, 203-218.
- 375 **Reiter, P. (1978).** The influence of dissolved oxygen content on the survival of submerged  
376 mosquito larvae. *Mosq. News* **38**, 334-337.
- 377 **Richards, A. G. (1941).** Differentiation between toxic and suffocation effects of petroleum  
378 oils on larvae of the house mosquito (*Culex pipiens* L.) (Diptera). *Trans. Amer. Entomol.*  
379 *Soc.* **67**, 161-193.
- 380 **Sen, S. K. (1914).** Observation on respiration of Culicidae. *Indian J. Med. Res.* **2**, 681-697.
- 381 **Silberbush, A., Abramsky, Z. and Tsurim, I. (2015).** Dissolved oxygen levels affect the  
382 survival and developmental period of the mosquito *Culex pipiens*. *J. Vector Ecol.* **40**, 425-  
383 427.
- 384 **Thorpe, W. H. (1933).** Tracheal and blood gills in aquatic insect larvae. *Nature* **131**, 549-550.
- 385 **Wang, L. S. (1938).** A comparative study of the oxygen requirements of mosquito larvae.  
386 *Chinese Med. J. Suppl.* **2**, 487-493.
- 387 **Westwood, A. R., Surgeoner, G. A. and Helson, B. V. (1983).** Survival of spring *Aedes spp.*  
388 mosquito (Diptera: Culicidae) larvae in ice-covered pools. *Can. Entomol.* **115**, 195-197.
- 389 **Wigglesworth, V. B. (1932).** Memoirs: On the function of the so-called 'rectal glands' of  
390 insects. *Journal of Cell Science* **2**, 131-150.

*Alvarez-Costa et al.*

391 **Wigglesworth, V. B. (1933).** The function of the anal gills of the mosquito larva. *J. of Exp.*  
392 *Biol.* **10**, 16–26.

393 **Wigglesworth, V. B. (1972).** *The Principles of Insect Physiology.* 8th Edition. London, UK:  
394 Chapman and Hall.

395

*Alvarez-Costa et al.*

396

397

398 **Table 1.** Proportion of pupae  $\pm$  s.e.m. (number of individuals) of *Ae. aegypti* larvae at control  
399 and submerged treatments at three temperatures: 15°, 25°, and 35°C.

| Temperature (°C) | Control              | Submerged |
|------------------|----------------------|-----------|
| 15°              | 0.09 $\pm$ 0.09 (11) | 0 (7)     |
| 25°              | 0.52 $\pm$ 0.11 (21) | 0 (36)    |
| 35°              | 0.18 $\pm$ 0.10 (16) | 0 (28)    |

400

401

402

403

404



405 **Figure Captions**

406 **Figure 1. (A)** Survival of *Ae. aegypti* larvae: control (solid line) and submerged treatments  
407 (dotted line) at three temperatures: 15°, 25°, and 35°C (blue, green, and red respectively). **(B)**  
408 Survival time 50 (estimated and 95 % confidence intervals) of *Ae. aegypti* larvae at control and  
409 submerged treatments at three temperatures: 15°, 25°, and 35 °C (blue, green, and red  
410 respectively). Different letters indicate significant differences between conditions (submerged  
411 and control) and between temperatures in the submerged condition ( $p < 0.05$ ). \*It was not  
412 possible to estimate the survival time 50 due to the lack of mortality in the control treatment at  
413 25 °C, so the value shown is the maximum survival time registered.

414 **Figure 2.** Consumption of water-dissolved O<sub>2</sub> (mean and 95 % confidence intervals) by *Ae.*  
415 *aegypti* larvae and pupae under three conditions: submerged, closed vial and open vial.  
416 Different letters indicate significant differences between treatments (Tukey multiple  
417 comparison).

418 **Figure 3. (A)** O<sub>2</sub> consumption (mean and 95 % confidence intervals) obtained from air and  
419 water of *Ae. aegypti* larvae and pupae in the closed vial condition. Different letters indicate  
420 significant differences between treatments (Tukey multiple comparison). Percentage of oxygen  
421 consumption of *Ae. aegypti* larvae **(B)** and pupae **(C)**, obtained from air and water.

422 **Figure 4.** Total O<sub>2</sub> consumption (mean and 95 % confidence intervals) of *Ae. aegypti* larvae  
423 and pupae with (dual) and without (submerged) access to air. Different letters indicate  
424 significant differences between treatments (Tukey multiple comparison).

425 **Figure 5.** Consumption of O<sub>2</sub> from water (mean and 95 % confidence intervals) by *Ae.*  
426 *albopictus* larvae under two conditions: submerged and closed vial. Different letters indicate  
427 significant differences between treatments.

428 **Figure 6. (A)** O<sub>2</sub> consumption (mean and 95 % confidence intervals) obtained from air and  
429 water of *Ae. albopictus* larvae in the closed vial condition. Percentage of oxygen consumption  
430 of *Ae. albopictus* larvae **(B)** obtained from air and water. Different letters indicate significant  
431 differences between treatments.

*Alvarez-Costa et al.*

432 **Figure 7.** Total O<sub>2</sub> consumption (mean and 95 % confidence intervals) of *Ae. albopictus* larvae  
433 with (dual) and without (submerged) access to air. Different letters indicate significant  
434 differences between treatments.  
435

*Alvarez-Costa et al.*

436

437

438 Supplementary material

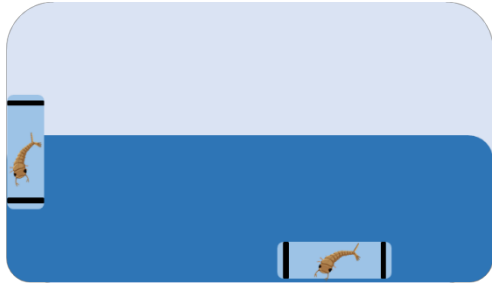

439

440 Fig S1. Setup for testing larval survival at different temperatures.

441

442

Figure 1

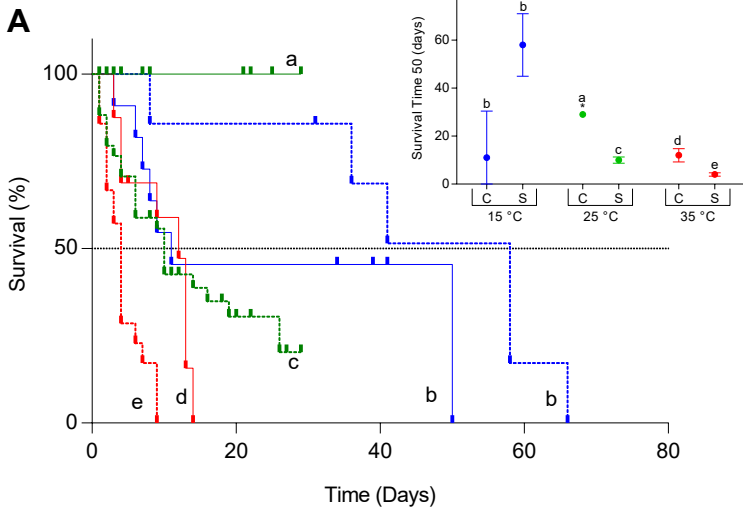

Figure 2

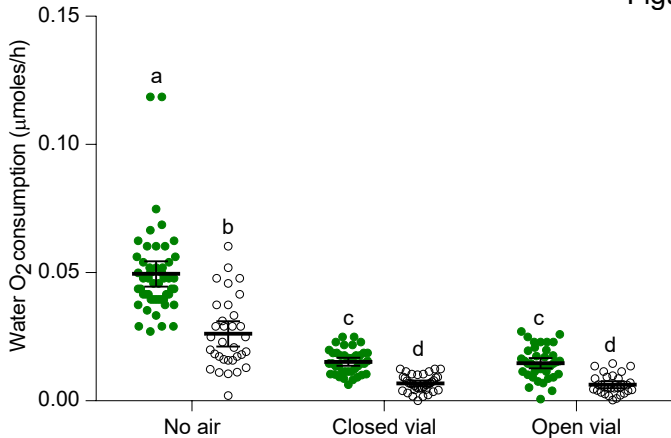

Figure 3

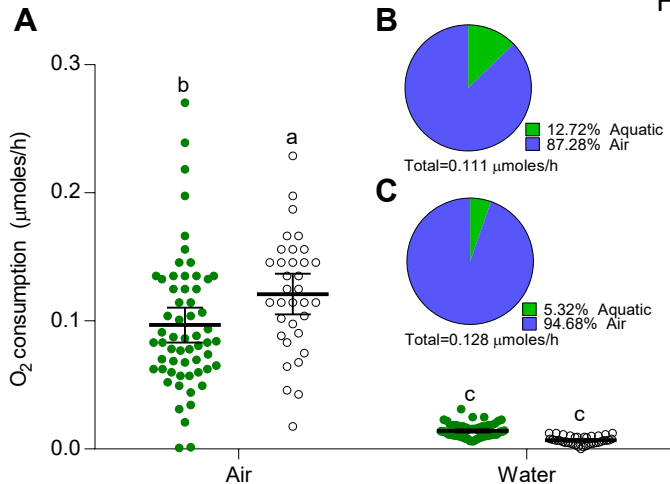

Figure 4

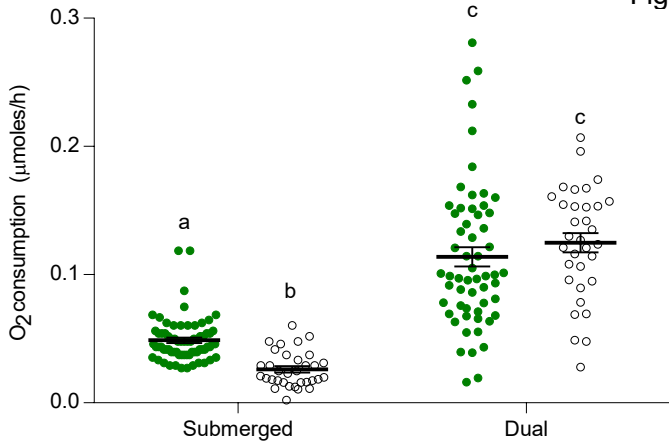



Figure 5

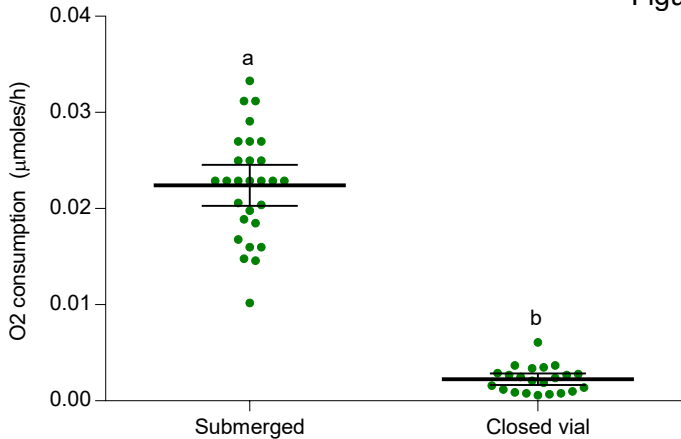

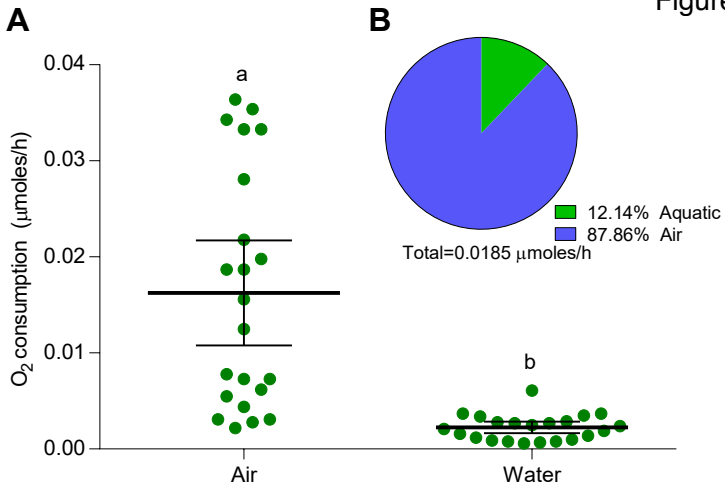

Figure 7

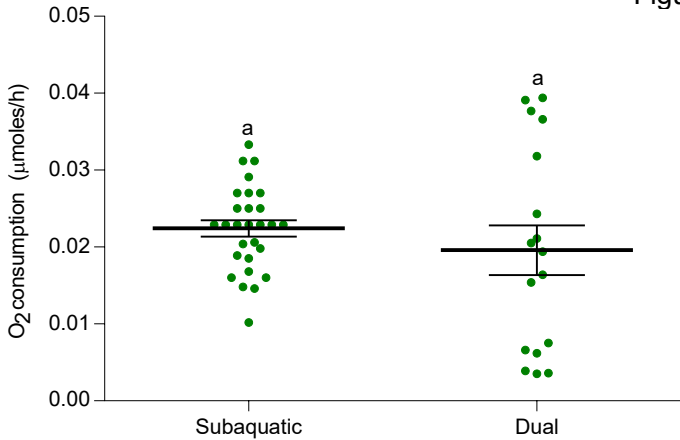

Source: https://www.biorxiv.org/content/10.1101/2023.03.06.531304v1.full.pdf
